# Supplementary material
Source: PubMed Central journal article supplement (PMC5077175)
Supplement: supp_tpc.16.00313_TPC2016-00313-RAR1_Supplemental_Data_pdf.pdf [file supp_tpc.16.00313_TPC2016-00313-RAR1_Supplemental_Data_pdf.pdf]

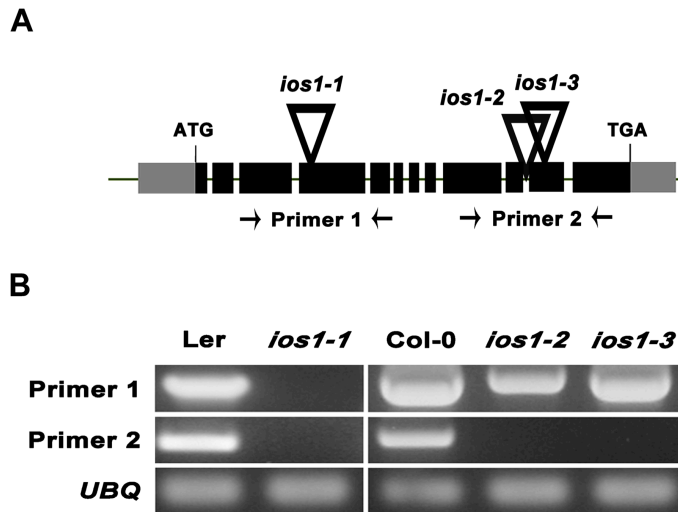

**Supplemental Figure 1.** The mutant *ios1-1* is a knock-out but *ios1-2* and *ios1-3* still produce some *IOS1* transcripts.

(A) Insertion sites in the *Ds* transposon insertion mutant *ios1-1*, and T-DNA insertion mutants *ios1-2* and *ios1-3*. Bold lines, exons; thin lines, introns; bold arrows, sites of insertion; thin arrows, primers used for RT-PCR.

(B) *IOS1* expression in Ler-0 WT and *ios1-1* and Col-0 WT, *ios1-2* and *ios1-3*. Analyses were performed by RT-PCR for 30 cycles. *UBQ10* was used as a loading control.

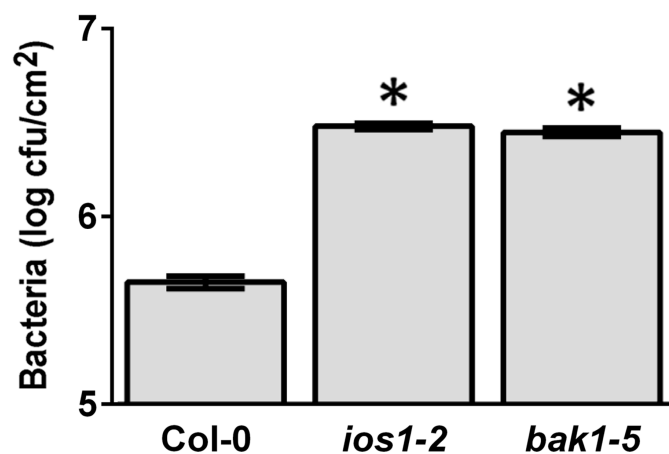

**Figure 2.** Susceptibility phenotypes of *ios1-2* and *bak1-5* to *Pst* DC3000.

Bacterial titers were evaluated at 2 dpi in 5-week-old *Arabidopsis* Col-0 WT, *ios1-2*, and *bak1-5* dip-inoculated with 10<sup>6</sup> cfu/mL *Pst* DC3000. Averages ± SE of 2 independent experiments each with 3 plants (n = 6). Asterisks indicate a significant difference to WT controls based on a paired two-tailed *t* test ( $P < 0.01$ ).

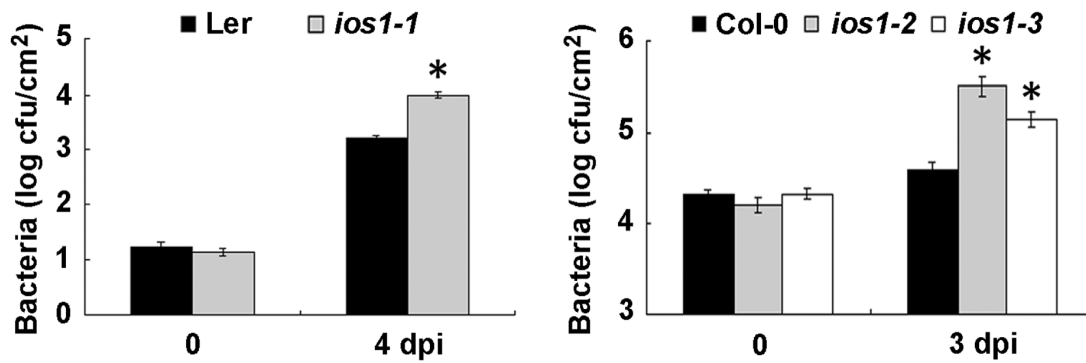

**Figure 3.** *ios1* mutants demonstrate increased susceptibility to *Pst* DC3000 *hrcC*<sup>-</sup>.

Bacterial titers were evaluated in 5-week-old Arabidopsis syringe-infiltrated with  $10^5$  cfu/mL *Pst* DC3000 *hrcC*<sup>-</sup> for Ler-0 and *ios1-1*, and  $10^8$  cfu/mL *Pst* DC3000 *hrcC*<sup>-</sup> for Col-0, *ios1-2* and *ios1-3*. Data  $\pm$  SE represent average of 3 independent experiments each consisting of 3 plants (n = 9). Asterisks indicate a significant difference to respective WT controls based on a paired two-tailed *t* test ( $P < 0.01$ ). dpi = days post inoculation.

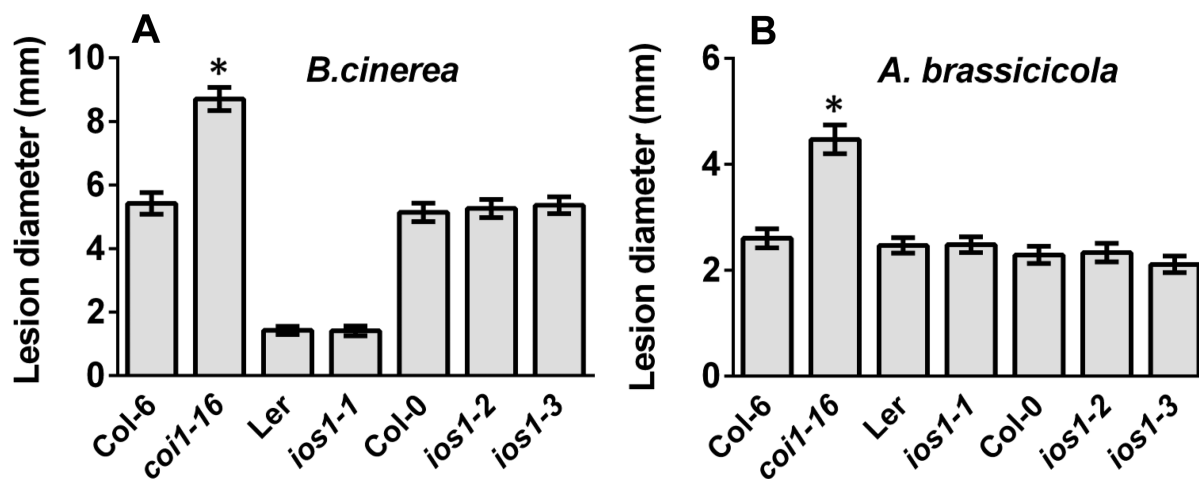

**Figure 4.** Resistance of *ios1* mutants to necrotrophic fungal pathogens.

**(A)** *B. cinerea*-mediated necrosis. Arabidopsis Ler-0 and Col-0 WT and corresponding *ios1-1*, *ios1-2*, and *ios1-3* mutants leaves were droplet-inoculated (10  $\mu$ L) with  $10^5$  *B. cinerea* spores/mL and lesion diameters were evaluated at 3 dpi. Data  $\pm$  SD represent 2 independent experiments each consisting of 6 plants ( $n = 12$ ). Asterisks indicate a significant difference to respective WT controls based on a paired two-tailed *t* test ( $P < 0.05$ ). The mutant *coi1-16* (Col-6 background) is known to be highly susceptible to *B. cinerea* and was thus used as a positive control.

**(B)** *A. brassicicola*-mediated necrosis. Arabidopsis Ler-0 and Col-0 WT and corresponding *ios1-1*, *ios1-2*, and *ios1-3* mutants leaves were droplet-inoculated (10  $\mu$ L) with  $5 \times 10^5$  *A. brassicicola* spores/mL and lesion diameters were evaluated at 4 dpi. Data  $\pm$  SD represent 2 independent experiments each consisting of 6 plants ( $n = 12$ ). Asterisks indicate a significant difference to respective WT controls based on a paired two-tailed *t* test ( $P < 0.05$ ). The mutant *coi1-16* (Col-6 background) is known to be hyper-susceptible to *A. brassicicola* and was thus used as a positive control.



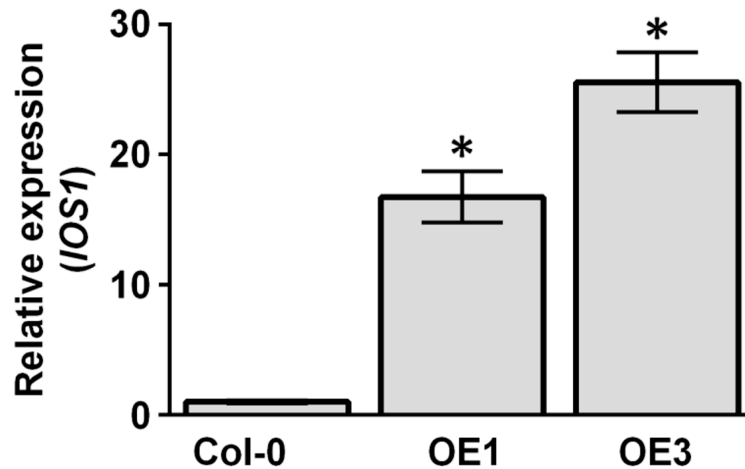

**Figure 5.** *IOS1* mRNA expression levels in 2 independent *IOS1* over-expression lines.

Gene expression levels in 10-day-old seedlings of 2 lines over-expressing *IOS1* (OE1 and OE3) relative to Col-0 WT (defined value of 1) were analyzed by RT-qPCR. *UBQ10* was used for normalization. Results are means  $\pm$  SD of 2 independent experiments with 3 plants each (n = 6). Asterisks indicate a significant difference to WT controls based on a paired two-tailed *t* test ( $P < 0.01$ ).

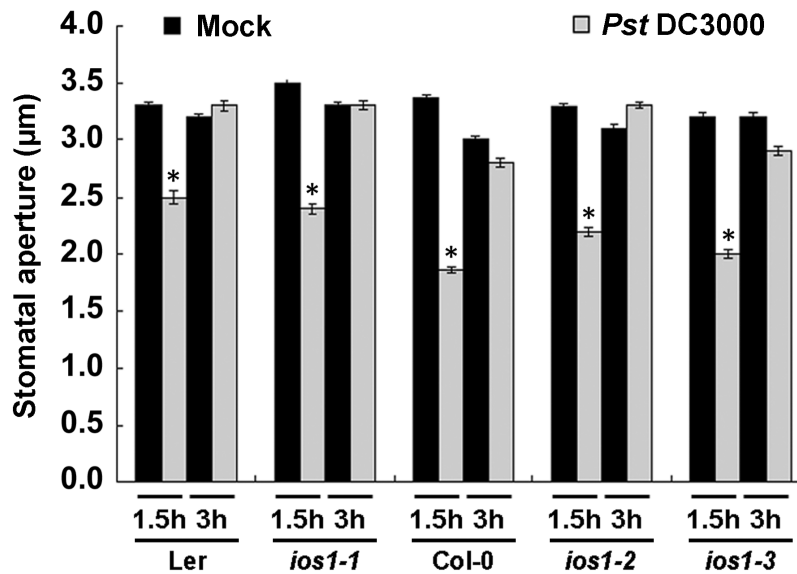

**Figure 6.** Stomatal innate immunity in *ios1* mutants.

Stomatal apertures in epidermal peels were analyzed after 1.5 h and 3 h exposure to  $\text{MgSO}_4$  (Mock) or  $10^8$  cfu/mL *Pst* DC3000 in Ler-0 and *ios1-1* and Col-0, *ios1-2* and *ios1-3*. Results are shown as mean  $\pm$  SE of 3 independent experiments each consisting of at least 60 stomata ( $n > 180$ ). Asterisks indicate a significant difference to mock control based on a paired two-tailed *t* test analysis ( $P < 0.001$ ).

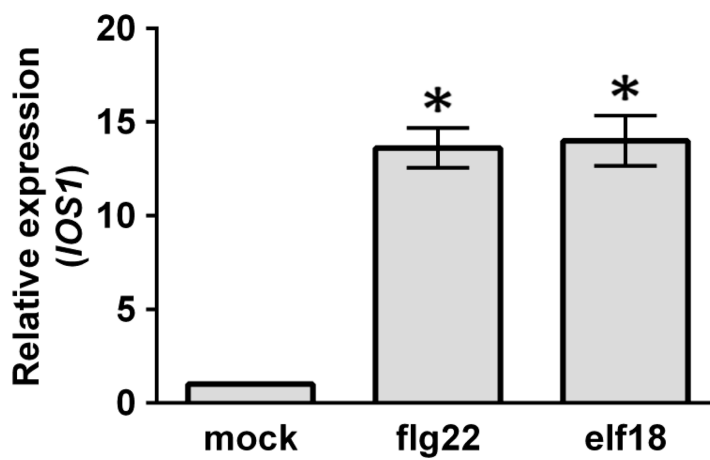

**Figure 7.** Expression of *IOS1* is up-regulated by bacterial MAMPs.

*IOS1* relative expression levels in 10-day-old seedlings at 1 h after treatment with 100 nM flg22 or elf18 were determined by qRT-PCR analysis. *UBQ10* was used for normalization. Relative expression levels were compared to mock, buffer-treated control (defined value of 1). Values are means  $\pm$  SD of 2 independent experiments with 3 plants each (n = 6). Asterisks indicate a significant difference to mock control based on a paired two-tailed *t* test ( $P < 0.01$ ).

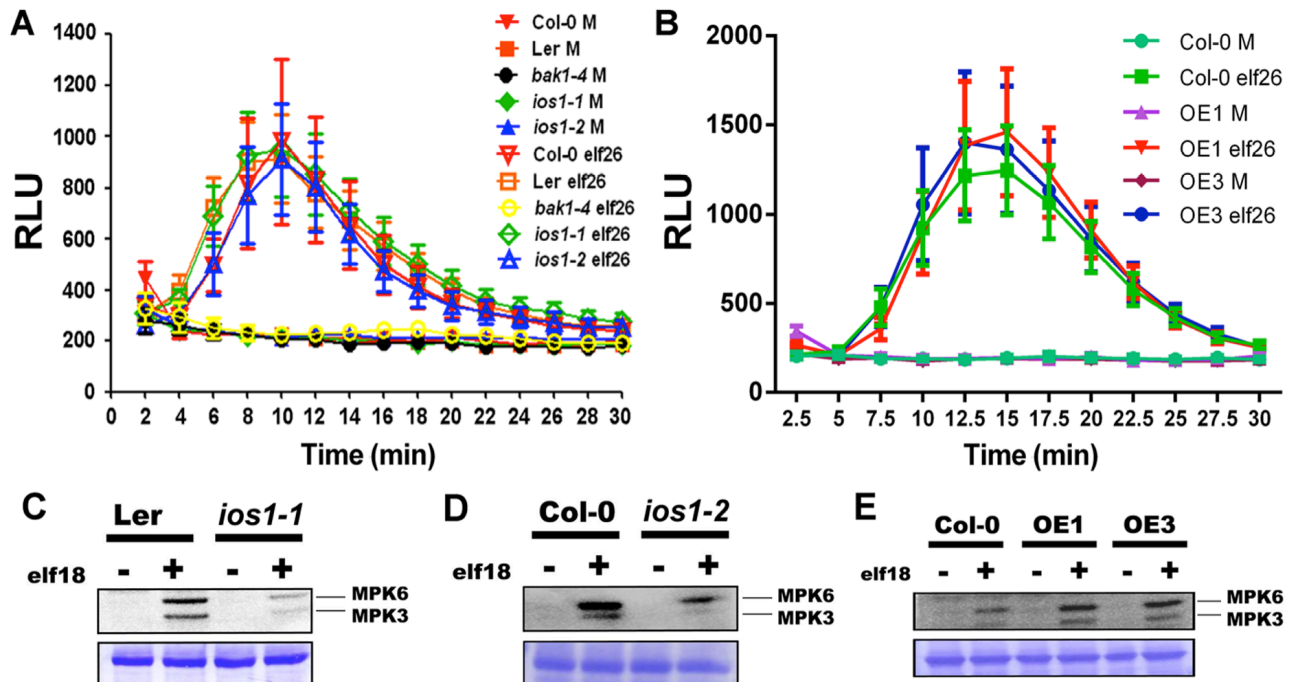

**Figure 8.** Early PTI responses.

**(A)** ROS production in *ios1* mutants. Responsiveness of 5-week-old Ler-0 and Col-0 WT controls and respective mutants *ios1-1* and *ios1-2* to 10 nM elf26. *bak1-4* was used as a negative control. Production of ROS in Arabidopsis leaf discs is expressed as relative light units (RLU) for a period of 30 min after elicitation. Values are means  $\pm$  SE of 3 independent experiments each with 6 leaf discs ( $n = 18$ ). Differences between *ios1* mutants and WT were not statistically significant based on a paired two-tailed *t* test ( $P < 0.01$ ).

**(B)** ROS production in *IOS1*-OE lines. Responsiveness of 5-week-old over-expression lines OE1 and OE3 and Col-0 WT control to 10 nM elf26. Production of ROS in Arabidopsis leaf discs is expressed as relative light units (RLU) for a period of 30 min after elicitation. Values are means  $\pm$  SE of 3 independent experiments each with 6 leaf discs ( $n = 18$ ). Differences between OE lines and WT were not statistically significant based on a paired two-tailed *t* test ( $P < 0.01$ ).

**(C and D)** MPK activation in *ios1* mutants. Ten-day-old Ler-0 and *ios1-1* or Col-0 and *ios1-2* were treated with 100 nM elf18 for 5 min. Immunoblot analysis using phospho-p44/42 MPK antibody is shown in top panel. Lines indicate the positions of MPK3 and MPK6. Coomassie

Brilliant Blue-staining is used to estimate equal loading in each lane (bottom panel). Experiments were repeated twice with similar results.

(E) MPK activation in *IOS1*-OE lines. Ten-day-old Col-0 and *IOS1* over-expression lines OE1 and OE3 were syringe-infiltrated with 50 nM elf18 for 5 min. Immunoblot analysis using phospho-p44/42 MKP antibody is shown in top panel. Lines indicate the positions of MPK3 and MPK6. Coomassie Brilliant Blue-staining is used to estimate equal loading in each lane (bottom panel). Similar results were observed in another independent repeat.

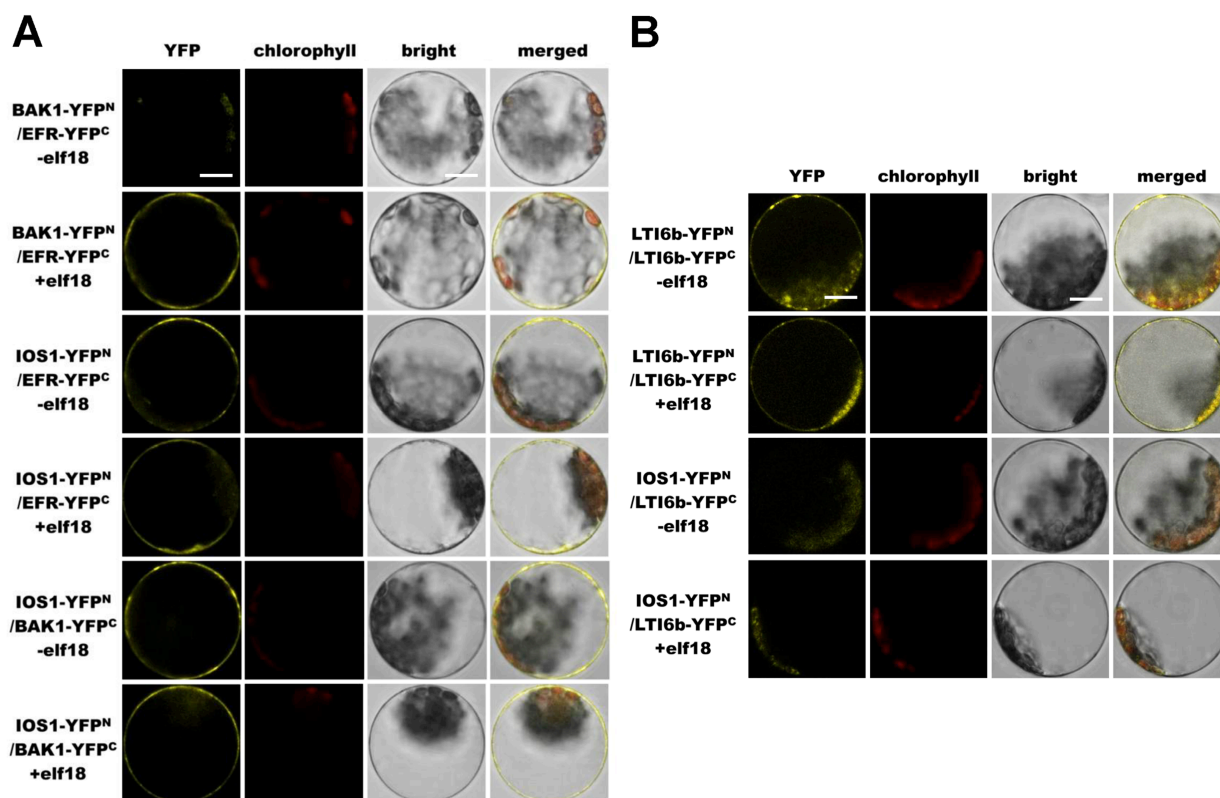

**Figure 9.** Bimolecular fluorescence complementation analyses of IOS1 interactions with EFR and BAK1.

(**A and B**) Arabidopsis protoplasts were co-transfected with BAK1-YFP<sup>N</sup> + EFR-YFP<sup>C</sup>, IOS1-YFP<sup>N</sup> + EFR-YFP<sup>C</sup> and IOS1-YFP<sup>N</sup> + BAK1-YFP<sup>C</sup> (A), LTI6b-YFP<sup>N</sup> + LTI6b-YFP<sup>C</sup> or IOS1-YFP<sup>N</sup> + LTI6b-YFP<sup>C</sup> (B) and treated with (+) or without (-) 100 nM elf18 for 10 min. The YFP fluorescence (yellow), chlorophyll autofluorescence (red), bright field and the combined images were visualized under a confocal microscope 16 h after transfection. Images are representative of multiple protoplasts. The experiment was repeated twice with similar results. Scale bars represent 10  $\mu$ m.

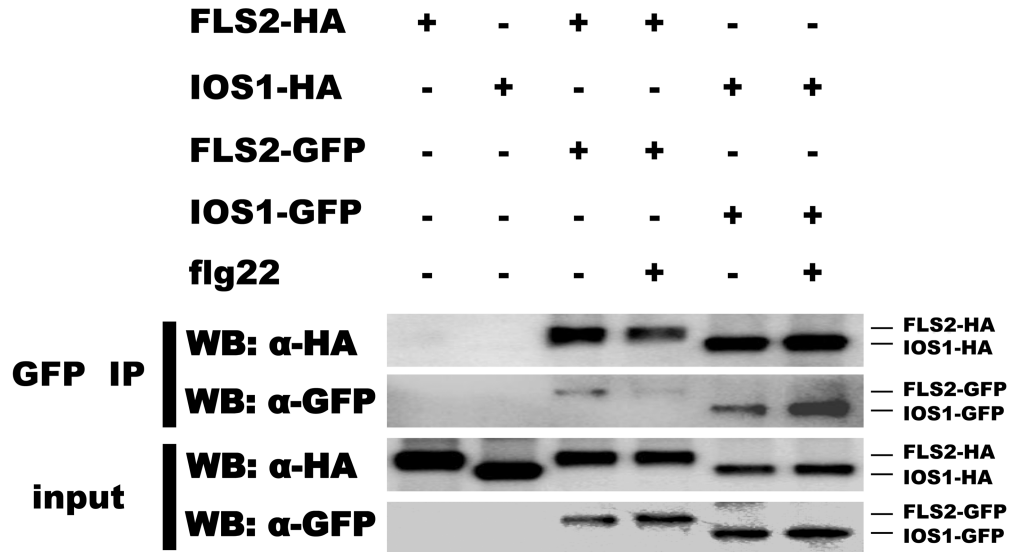

**Figure 10.** FLS2-FLS2 and IOS1-IOS1 dimerization.

Co-immunoprecipitation of FLS2-GFP and FLS2-HA<sub>3</sub> or IOS1-GFP and IOS1-HA<sub>3</sub> were performed by expression of FLS2-HA<sub>3</sub> or IOS1-HA<sub>3</sub> constructs only as a negative control or FLS2-GFP with FLS2-HA<sub>3</sub> or IOS1-GFP with IOS1-HA<sub>3</sub> in Arabidopsis protoplasts. Total proteins (input) were subjected to immunoprecipitation with GFP-Trap beads followed by immunoblot analysis with anti-HA antibodies to detect FLS2-HA<sub>3</sub> or IOS1-HA<sub>3</sub>. Anti-GFP antibodies detect FLS2-GFP and IOS1-GFP. Experiments were repeated twice with similar results.

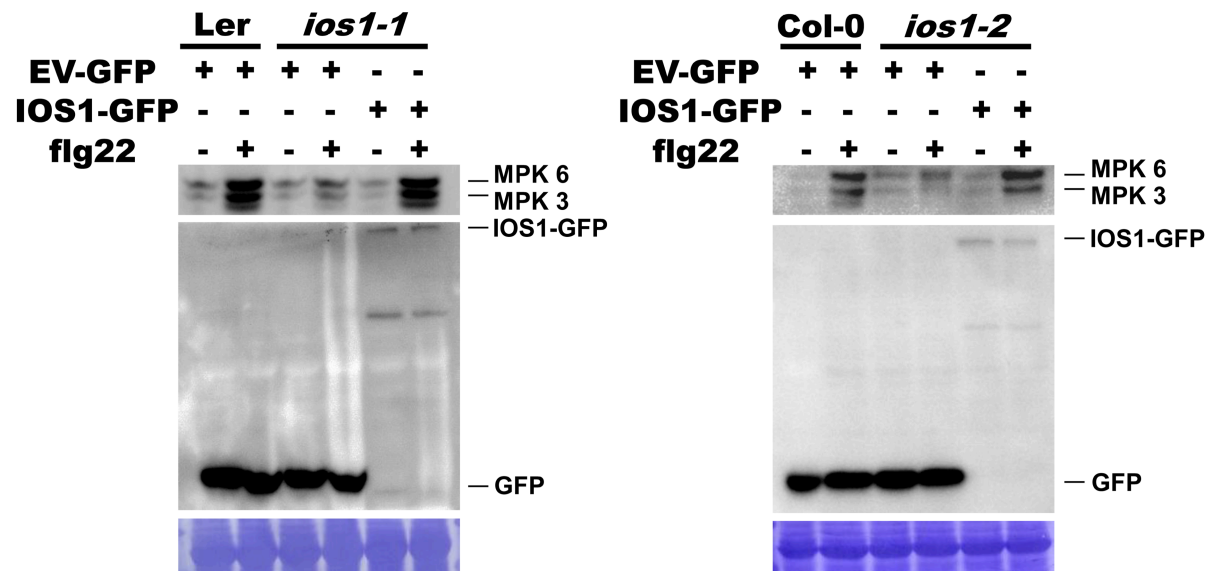

**Figure 11.** Complementation of defective MPK activation in *ios1-1* and *ios1-2* mutants by IOS1-GFP.

*Ler-0* and *ios1-1* or *Col-0* and *ios1-2* Arabidopsis protoplasts expressing IOS1-GFP or the Empty Vector (EV)-GFP were treated with (+) or without (-) 100 nM flg22 for 5 min. Immunoblot analysis using phospho-p44/42 MPK antibody is shown in top panel. Lines indicate the positions of MPK3 and MPK6. Anti-GFP antibody detects IOS1-GFP and EV-GFP (middle panel). Coomassie Brilliant Blue-staining is used to estimate equal loading in each lane (bottom panel). Experiments were repeated twice with similar results.



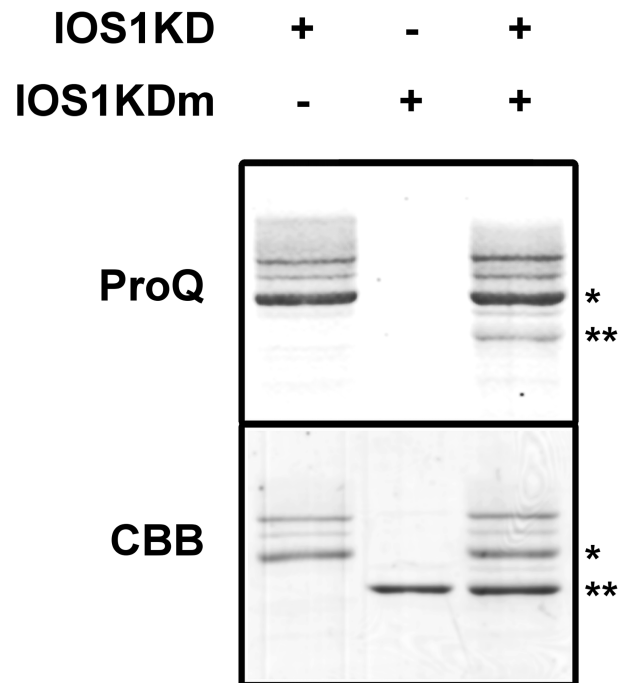

**Figure 12.** IOS1 *in vitro* autophosphorylation.

Two microgram of each affinity purified IOS1 active kinase (IOS1KD) and IOS1 kinase dead (IOS1KDm) were subjected to *in vitro* autophosphorylation reaction. SDS page of the whole reaction was stained by Pro-Q Diamond (ProQ), and subsequently stained with Coomassie Brilliant Blue (CBB). One or two asterisks indicate the LC-MS/MS confirmed peptides for IOS1KD or IOS1KDm, respectively.

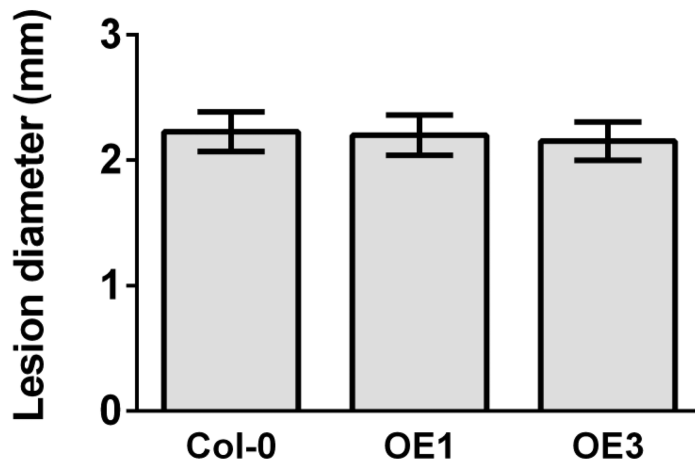

**Figure 13.** *A. brassicicola*-mediated lesions in lines overexpressing IOS1.

Arabidopsis leaves of Col-0 and *IOS1* overexpression lines OE1 and OE3 were droplet-inoculated (10  $\mu$ L) with  $5 \times 10^5$  *A. brassicicola* spores/mL and lesion diameters were evaluated at 4 dpi. Data are average  $\pm$  SD of lesion diameters from 2 independent experiments each with 6 plants ( $n = 12$ ). No significant differences to WT controls were observed when based on a paired two-tailed *t* test ( $P < 0.01$ ).

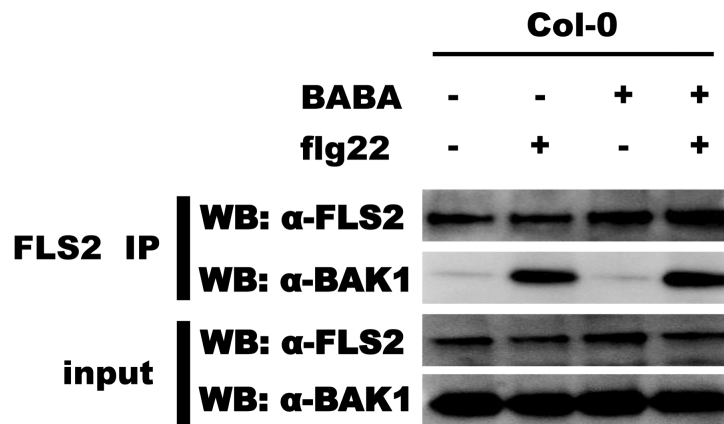

**Figure 14.** BABA does not regulate ligand-induced FLS2-BAK1 association.

Co-immunoprecipitation analysis was performed with seedlings grown on ½ MS plates with or without 30 μM BABA for 10 days and seedlings on the plates were submerged in a 100 nM flg22 solution for 10 min before collection. Total proteins (input) were subjected to immunoprecipitation (IP) with anti-FLS2 antibodies and IgG beads followed by immunoblot analysis using anti-FLS2 and anti-BAK1 antibodies. The experiment shown is one of 2 independent replicates.

**Table 1.** Identification of IOS1 tryptic peptides by HPLC-ESI-MS/MS analysis of EFR immunoprecipitates.

| Peptide Sequence     | Peptide probability | <i>n</i><br>Peptides | Occurrence <sup>a</sup> |                 | Best Mascot Score |
|----------------------|---------------------|----------------------|-------------------------|-----------------|-------------------|
|                      |                     |                      | no treatment            | elf18 treatment |                   |
| (R)ADVGATVNQGYR(Y)   | 95%                 | 6                    | 3/8                     | 2/8             | 71.44             |
| (K)LADFGLSR(S)       | 95%                 | 1                    | 0/8                     | 1/8             | 42.17             |
| (K)TGNATPFISALELR(K) | 95%                 | 2                    | 0/8                     | 1/8             | 39.09             |
| (R)TQFQQQTWNLR(S)    | 95%                 | 8                    | 2/8                     | 3/8             | 62.96             |
| (K)AEVELLLR(V)       | 95%                 | 1                    | 0/8                     | 1/8             | 37.88             |
| (K)RGPSILTWEGR(L)    | 95%                 | 1                    | 0/8                     | 1/8             | 36.15             |
| (R)YGIDVFDR(V)       | 95%                 | 1                    | 0/8                     | 1/8             | 41.27             |
| (R)KLTYIDVVK(I)      | 95%                 | 3                    | 2/8                     | 1/8             | 37.82             |

<sup>a</sup>Occurrence of specific tryptic peptides in eight independent biological replicates combining 4 experiments performed using GFP-Trap beads and 4 experiments using anti-GFP magnetic beads for immunoprecipitation of EFR-GFP.

| <b>Table 2. Primer sequences used in this study.</b> |                           |               |                                                    |
|------------------------------------------------------|---------------------------|---------------|----------------------------------------------------|
| <b>Gene name</b>                                     | <b>Purpose</b>            | <b>Primer</b> | <b>Sequence</b>                                    |
| <i>UBQ10</i><br>(At4g05320)                          | RT-qPCR/RT-PCR            | Forward       | 5' - GGCCTTGTATAATCCCTGATGA -3'                    |
|                                                      |                           | Reverse       | 5' - AAAGAGATAACAGGAACGGAAA -3'                    |
| <i>FRK1</i><br>(At2g19190)                           | RT-qPCR                   | Forward       | 5' - GCCAACGGAGACATTAGAG -3'                       |
|                                                      |                           | Reverse       | 5' - CCATAACGACCTGACTCATC -3'                      |
| <i>IOS1</i><br>(At1g51800)                           | RT-qPCR                   | Forward       | 5' - CTTGACCGGAGAGATCTTAG -3'                      |
|                                                      |                           | Reverse       | 5' - AGCTAGAGAAACTCTGGGACTG -3'                    |
| <i>IOS1</i> CDS<br>(At1g51800)                       | Plasmid constructs        | Forward       | 5' - GCGCTACCACGAAAAAGAAG -3'                      |
|                                                      |                           | Reverse       | 5' - CGCTTCCCTGATAAGTGCTC -3'                      |
| <i>CERK1</i> CDS<br>(At3g21630)                      | Plasmid constructs        | Forward       | 5' - ATGAAGCTAAAGATTTCTCTAATCGCTC -3'              |
|                                                      |                           | Reverse       | 5' - CCGGCCGGACATAAGACTGACT -3'                    |
| <i>IOS1</i><br>(At1g51800)                           | Primer 1, T-DNA           | Forward       | 5' - CTTAATTTACCACGTCTTCCG -3'                     |
|                                                      | RT-PCR                    | Reverse       | 5' - GAGCAGAGGAGGTAAAGTCGAA -3'                    |
| <i>IOS1</i><br>(At1g51800)                           | Primer 2, T-DNA           | Forward       | 5' - GAAGCGTGGACCGTGCATACTA -3'                    |
|                                                      | RT-PCR                    | Reverse       | 5' - GCAAACCGCAAATAGTTCACC -3'                     |
| <i>ios1-1</i>                                        | Mutant line confirmation  | Forward       | 5' - CAACCACGAACGAGACCGAAG -3'                     |
|                                                      |                           | Reverse       | 5' - GCCGTAAGCCGACTTGATGTTC -3'                    |
| <i>ios1-2</i>                                        | Mutant line confirmation  | Forward       | 5' - TCCGTGAAGAAGACGGATTC -3'                      |
|                                                      |                           | Reverse       | 5' - TAGCGAAAAACCGGAAATTG -3'                      |
| <i>ios1-3</i>                                        | Mutant line confirmation  | Forward       | 5' - TGCGGTAAAGATGCTCACACTG -3'                    |
|                                                      |                           | Reverse       | 5' - TCATGTCTATCACGGGTTGG -3'                      |
| <i>IOS1</i><br>(At1g51800)                           | Cytosolic domain cloning  | Forward       | 5' - GGATCCAAGAGGAAGAAGAGAACC -3'                  |
|                                                      |                           | Reverse       | 5' - CTCGAGTCATCTAGCTCCTGGATTAAGC -3'              |
| <i>IOS1</i><br>(At1g51800)                           | Site-directed mutagenesis | Forward       | 5' - GCAAATAGTTCACCGCAACATTAAGACTA<br>CTAACATC -3' |
|                                                      |                           | Reverse       | 5' - GATGTTAGTAGTCTTAATGTTGCGGTGAAC<br>TATTTGC -3' |
